# Supplementary material for: Correction: Oncogenic Herpesvirus KSHV Hijacks BMP-Smad1-Id Signaling to Promote Tumorigenesis
Source: PLoS Pathog. 2022 Mar 14;18(3):e1010390. doi: 10.1371/journal.ppat.1010390 (PMC8920289; doi:10.1371/journal.ppat.1010390)
Supplement: S3 File — (XLSX) [file ppat.1010390.s004.xlsx]

## Sheet: Sheet1
	MM	MM-Id1#2
Id1	57.08	215.74
Actin	229.73	231.23
Id1/Actin	0.248466	0.93301
Normalized to MM	1	3.75509
